# Supplementary material for: The effects of sodium-glucose co-transporter 2 inhibitors in patients with type 2 diabetes: protocol for a systematic review with meta-analysis of randomised trials
Source: PubMed Central journal article supplement — BMJ Open. 2014 Aug 13;4(8):e005378. doi: 10.1136/bmjopen-2014-005378 (PMC4139650; doi:10.1136/bmjopen-2014-005378), 2014-08-13
Supplement: bmjopen-2014-005378.draft_revisions.pdf [file bmjopen-2014-005378.draft_revisions.pdf]

# BMJ Open

## The effects of sodium-glucose co-transporter 2 inhibitors in patients with type 2 diabetes: protocol for a systematic review with meta-analysis of randomised trials

|                                 |                                                                                                                                                                                                                                                                                                                                                                                                                                                                                                                                        |
|---------------------------------|----------------------------------------------------------------------------------------------------------------------------------------------------------------------------------------------------------------------------------------------------------------------------------------------------------------------------------------------------------------------------------------------------------------------------------------------------------------------------------------------------------------------------------------|
| Journal:                        | <i>BMJ Open</i>                                                                                                                                                                                                                                                                                                                                                                                                                                                                                                                        |
| Manuscript ID:                  | bmjopen-2014-005378                                                                                                                                                                                                                                                                                                                                                                                                                                                                                                                    |
| Article Type:                   | Protocol                                                                                                                                                                                                                                                                                                                                                                                                                                                                                                                               |
| Date Submitted by the Author:   | 02-Apr-2014                                                                                                                                                                                                                                                                                                                                                                                                                                                                                                                            |
| Complete List of Authors:       | Storgaard, Heidi; Gentofte Hospital, University of Copenhagen, Diabetes Research Division, Department of Internal Medicine<br>Glud, Lise; Department of Gastroenterology, Christensen, Mikkel; Bispebjerg Hospital, University of Copenhagen, Department of Clinical Pharmacology<br>Knop, Filip; Gentofte Hospital, University of Copenhagen, Diabetes Research Division, Department of Internal Medicine<br>Vilsbøll, Tina; Gentofte Hospital, University of Copenhagen, Diabetes Research Division, Department of Internal Medicine |
| <b>Primary Subject Heading</b>: | Diabetes and endocrinology                                                                                                                                                                                                                                                                                                                                                                                                                                                                                                             |
| Secondary Subject Heading:      | Pharmacology and therapeutics                                                                                                                                                                                                                                                                                                                                                                                                                                                                                                          |
| Keywords:                       | Type 2 diabetes, meta-analysis, sodium-glucose co-transporter 2 inhibitor, ORAL MEDICINE                                                                                                                                                                                                                                                                                                                                                                                                                                               |
|                                 |                                                                                                                                                                                                                                                                                                                                                                                                                                                                                                                                        |

SCHOLARONE™  
Manuscripts

only

1  
2  
3  
4 **The effects of sodium-glucose co-transporter 2 inhibitors in patients with type**  
5  
6 **2 diabetes: protocol for a systematic review with meta-analysis of randomised**  
7  
8 **trials**  
9

10  
11  
12 *Heidi Storgaard<sup>1</sup>, Lise L. Gluud<sup>2</sup>, Mikkel Christensen<sup>1,3</sup>, Filip K. Knop<sup>1,4</sup>, Tina Vilsbøll<sup>1</sup>*  
13  
14

15  
16 <sup>1</sup>Diabetes Research Division, Department of Medicine, Gentofte Hospital, University  
17 of Copenhagen, Hellerup, Denmark; <sup>2</sup>Gastrounit, Hvidovre Hospital, University of  
18 Copenhagen, Hvidovre, Denmark; <sup>3</sup>Department of Clinical Pharmacology, Bispebjerg  
19 Hospital, University of Copenhagen, Copenhagen, Denmark; <sup>4</sup>Department of  
20 Biomedical Sciences, Faculty of Health and Medical Sciences, University of  
21 Copenhagen, Copenhagen, Denmark  
22  
23

24  
25  
26  
27  
28  
29  
30  
31 Correspondence to:  
32 Heidi Storgaard, MD PhD  
33 Diabetes Research Division, Department of Medicine  
34 Gentofte Hospital, University of Copenhagen  
35 Niels Andersens Vej 65  
36 DK-2900 Hellerup  
37 Denmark  
38 Phone: +4539773711 ; Fax: +45 3977 7661; e-mail: heidi.storgaard@regionh.dk  
39  
40

41  
42 Keywords: sodium-glucose co-transporter 2 inhibitors, type 2 diabetes, meta-  
43 analyses, oral medicine  
44

45 Word count (excluding title page, abstract and references): 1752  
46  
47  
48  
49  
50  
51  
52  
53  
54  
55  
56  
57  
58  
59  
60

## Abstract

Introduction: Sodium glucose co-transporter 2 inhibitors (SGLT-2i) increase urinary glucose excretion through a reduced renal glucose reabsorption. We plan to perform a systematic review of SGLT-2i for treatment of type 2 diabetes.

Methods and analysis: A systematic review with meta-analyses of randomised clinical trials on SGLT-2i versus placebo, other oral glucose lowering drugs or insulin for patients with type 2 diabetes will be performed. The primary endpoint will be HbA1c. Secondary endpoints will include changes in body weight, body mass index, fasting plasma glucose, plasma cholesterol, kidney and liver blood tests, blood pressure, and adverse events. Electronic (The Cochrane Library, MEDLINE, EMBASE, and Science Citation Index) and manual searches will be performed. Meta-analyses will be performed and the results presented as mean differences for continuous outcomes and risk differences for dichotomous outcomes, both with 95% confidence intervals (CI). Subgroup, sensitivity, regression and sequential analyses will be performed to evaluate inter-trial heterogeneity, bias and the robustness of the results due to cumulative testing.

Ethics and dissemination: The study will contribute to the knowledge regarding the beneficial and harmful effects of SGLT-2i in patients with type 2 diabetes. We plan to publish the study irrespective of the results.

Results: The study will be disseminated by peerreview publication and conference presentation.

Protocol registration: PROSPERO CRD42014008960

## ARTICLE SUMMARY

### *Article focus*

Impact of sodium-glucose co-transporter 2 inhibitors (SGLT-2i) on glycaemic control (hbA1c), effects on fasting plasma glucose, body weight (body mass index, BMI), lipids, liver and kidney blood tests, blood pressure and adverse events in patients with type 2 diabetes.

### *Key messages*

A systematic review with meta-analysis on the glucose-lowering effect and safety of SGLT-2i in patients with type 2 diabetes in clinically relevant daily doses is lacking. Individualised treatment is recommended and new and safe drugs with alternative modes of action are needed for patients with type 2 diabetes to reach their treatment goals.

### *Strengths and limitations of this study*

We have the knowledge and experience within our group on how to conduct a systemic review and meta-analysis. A possible limitation might be the access to data from the randomised clinical trials we plan to include in the study.

only

## INTRODUCTION

1  
2  
3  
4  
5  
6 Type 2 diabetes is a metabolic disease associated with obesity, dyslipidaemia and  
7  
8 hypertension. Patients with type 2 diabetes are characterised by defective insulin  
9  
10 secretion, insulin resistance, inappropriate glucagon secretion and an impaired  
11  
12 incretin effect resulting in fasting and postprandial hyperglycaemia [1].  
13  
14 Hyperglycaemia with elevated levels of glycated haemoglobin A<sub>1c</sub> (HbA<sub>1c</sub>) predicts  
15  
16 micro- and macrovascular complications [2]. Although improved metabolic control is  
17  
18 associated with reduced morbidity and mortality [3], recent studies show that  
19  
20 intensive glucose lowering treatments may harm some patients [4–7]. As a  
21  
22 consequence the American Diabetes Association (ADA) and the European  
23  
24 Association for the Study of Diabetes (EASD) recommends individualisation of the  
25  
26 treatment [8]. Drugs with complementary mechanisms of action are recommended  
27  
28 with metformin as first-line therapy. As  $\beta$  cell function declines, a number of patients  
29  
30 fail to achieve their glycaemic target and maintenance of glucose control often  
31  
32 necessitates several add-on therapies [8]. Current oral medications endorsed by  
33  
34 ADA and EASD treatment algorithms for treating patients with type 2 diabetes i.e.  
35  
36 metformin, sulphonylureas, dipeptidyl peptidase 4 inhibitors and thiazolidinediones  
37  
38 act by increasing insulin secretion or sensitizing tissues to insulin action. Treatment  
39  
40 strategies with insulin-independent pathways could therefore be advantageous.  
41  
42  
43  
44  
45

46  
47 Sodium-glucose co-transporter 2 inhibitors (SGLT-2i) represent a new class of drugs  
48  
49 that inhibit glucose reabsorption in the proximal tubules of the kidneys. As a result,  
50  
51 urinary glucose excretion is increased, which in turn reduces the amount of  
52  
53 circulating glucose and improves glycaemic control. The effect is not associated with  
54  
55 insulin secretion or action [9].  
56  
57  
58  
59  
60

1  
2  
3  
4 In clinical trials, SGLT-2i (in monotherapy or combined with metformin,  
5 sulphonylureas, pioglitazone, or insulin) seems to improve glycaemic control in type 2  
6 diabetes [10–14]. In 2013 and 2014, two SGLT-2i, canagliflozin and dapagliflozin,  
7  
8 were approved by the United States Food and Drug Administration (FDA) [15,16] and  
9  
10 the European Medicine Agency (EMA) for the treatment of patients with type 2  
11  
12 diabetes [17,18]. None of the individual clinical trials on SGLT-2i provide definite  
13  
14 conclusions regarding efficacy and safety and so far current guidelines for the  
15  
16 management of type 2 diabetes do not include SGLT-2i [8]. In order to provide robust  
17  
18 evidence for the efficacy and safety of SGLT-2i we plan to perform a systematic  
19  
20 review with meta-analyses of randomised controlled trials (RCTs). Unlike previous  
21  
22 systematic reviews, we plan to include focus on trials assessing on SGLT-2i in doses  
23  
24 that are recommended for clinical practice.  
25  
26  
27  
28  
29  
30  
31  
32

## 33 **OBJECTIVES**

34  
35  
36 The primary objective of this systematic review is to evaluate the effects of SGLT-2i  
37  
38 that are approved (dapagliflozin and canagliflozin) or is in late clinical development  
39  
40 (empagliflozin). To increase external validity, we plan to only include trials with  
41  
42 clinically relevant daily doses (canagliflozin 300 mg, dapagliflozin 10 mg and  
43  
44 empagliflozin 25 mg). Our primary objective will be to assess the impact on  
45  
46 glycaemic control (HbA<sub>1c</sub>).  
47  
48  
49  
50  
51  
52  
53  
54  
55  
56  
57  
58  
59  
60

## METHODS

The reporting of the review will follow the preferred reporting items for systematic reviews and meta-analysis (PRISMA) statement [19] .

### ***Criteria for considering studies for this review***

*Studies.* The review will include RCTs irrespective of blinding and language..

*Participants.* Adult patients (at least 18 years of age) of both genders with type 2 diabetes will be included.

*Interventions.* The intervention comparisons will constitute SGLT-2i (dapagliflozin, canagliflozin and empagliflozin) versus placebo, other anti-diabetic drugs or insulin. Co-interventions with other anti-diabetic agents will be allowed if administered to both the intervention and control group.

### ***Types of outcome measures***

The following outcome measures will be assessed

#### *Primary outcome measure*

- HbA<sub>1c</sub>

#### *Secondary outcome measures*

- Body weight and BMI
- Fasting plasma glucose
- Low density lipoprotein (LDL)-cholesterol

- Systolic and diastolic blood pressure
- Liver and kidney blood tests
- Adverse events

### ***Search methods for identification of studies***

All authors will participate in the identification and selection of trials. Excluded trials will be listed with the reason for exclusion. Authors will extract data in an independent manner. Eligible trials will be identified through electronic and manual searches. Electronic searches will be performed in MEDLINE ((Sodium-glucose [All Fields] AND co-transporter [All Fields]) OR ("2-(3-(4-ethoxybenzyl)-4-chlorophenyl)-6-hydroxymethyltetrahydro-2H-pyran-3,4,5-triol" [Supplementary Concept] OR "2-(3-(4-ethoxybenzyl)-4-chlorophenyl)-6-hydroxymethyltetrahydro-2H-pyran-3,4,5-triol" [All Fields] OR "dapagliflozin" [All Fields]) OR ("canagliflozin"[Supplementary Concept] OR "canagliflozin" [All Fields]) OR ("empagliflozin" [Supplementary Concept] OR "empagliflozin" [All Fields]) OR Remogliflozin [All Fields] OR ("sergliflozin" [Supplementary Concept] OR "sergliflozin" [All Fields]) OR ("6-((4-ethylphenyl)methyl)-3',4',5',6'-tetrahydro-6'-(hydroxymethyl)spiro(isobenzofuran-1(3H),2'-(2H)pyran)-3',4',5'-triole" [Supplementary Concept] OR "6-((4-ethylphenyl)methyl)-3',4',5',6'-tetrahydro-6'-(hydroxymethyl)spiro(isobenzofuran-1(3H),2'-(2H)pyran)-3',4',5'-triole" [All Fields] OR "tofogliflozin" [All Fields])), Cochrane Library, Embase and Web of science. Additional manual searches will be performed in reference lists of relevant papers, correspondence with experts, the pharmaceutical companies producing SGLT-2i and the World Health Organisation Trial Search Database [20].



### ***Data collection and analysis***

Two authors (HS and MC) will independently extract data and resolve disagreements through discussion before analysis. In the case of unresolved matters, a third party (TV, FK or LLG) will be involved. If necessary data are not included in the published trial reports, authors of included trials will be contacted for additional information.

### ***Selection of studies***

Trials identified through the searches will be listed and selected for inclusion according to the above mentioned criteria.

### ***Data extraction***

Extraction forms developed for the study will be used and the following data will be extracted: Trial characteristics (number of clinical sites, country of origin and funding), intervention characteristics (type, dose and duration of interventions applied), patient characteristics (inclusion criteria, background treatment, mean age, proportion of men, duration of type 2 diabetes, body weight, BMI, baseline systolic and diastolic blood pressure baseline HbA<sub>1c</sub>, baseline blood tests, fasting plasma glucose, LDL-cholesterol, alanine amino transferase, alkaline phosphatase, creatinine and urate.

### ***Assessment of risk of bias in included studies***

The bias risk assessment will follow the recommendations described in the Cochrane Handbook for Reviews of Interventions and includes:

- Randomisation (selection bias): the randomisation methods will be extracted as the primary measure of bias control [21]. Methodological quality in the randomisation methods will be based on the allocation sequence generation (adequate if based on a table of random numbers, computer-generated random numbers or similar) and allocation concealment (adequate if randomisation was performed through serially numbered opaque sealed envelopes, a central independent unit, identically appearing coded drug containers or similar).
- Blinding (performance and detection bias): we will extract data on whether single or double blinding was performed, the method of blinding (e.g., use of placebo) and the persons who were blinded with regard to the interventions assessed (e.g., health care providers or patients).
- Incomplete outcome data (attrition bias): the extent to which all patients lost to follow-up are accounted for.
- Outcome reporting (reporting bias): the extent to which clinically relevant outcome measures are reported and differences between trial protocols and subsequent reports will be evaluated as a marker of reporting bias.
- Other bias: any other apparent biases will be evaluated.

### ***Statistical analyses***

The analyses will be performed in RevMan [22] and Stata Version 13 (STATA Corp, College Station, Texas, US). Analyses will be based on individual patient data when available or on published data.  $I^2$  will be used as a measure of heterogeneity.  $I^2$

1  
2  
3  
4 values below 30% will be defined as unimportant, 30-50% as moderate  
5  
6 heterogeneity, 50-75% as substantial heterogeneity and  $I^2$  values >75% will be  
7  
8 defined as considerable heterogeneity. Irrespective of the statistical heterogeneity,  
9  
10 both fixed effect and random effects models will be used to test the robustness of the  
11  
12 results. We will only report the results of the random effects meta-analyses if the  
13  
14 results differ from the fixed effect models. Publication bias and other small study  
15  
16 effects will be evaluated based on regression analysis (Egger's or Harbord's test).  
17  
18

19  
20 Subgroup analyses will be performed to evaluate sources of heterogeneity.  
21  
22 Differences between subgroups will be explored using tests for subgroup differences  
23  
24 expressed as  $p$  values. The subgroup analyses will evaluate the influence of the type  
25  
26 of data (individual patient data or published data), the control groups, collateral  
27  
28 interventions, glycaemic control at baseline, duration of diabetes, baseline  
29  
30 bodyweight (outcomes will be recalculated for patients who are normal weight  
31  
32 defined as a maximum BMI of 25 kg/m<sup>2</sup> at the time of randomisation) and publication  
33  
34 status and bias control.  
35  
36

37  
38  
39 *Measures of treatment effect.* Dichotomous data will be analysed using risk  
40  
41 differences (RD) and continuous data using mean differences, both with 95% CIs.  
42  
43 The number needed to treat will be calculated as the inverse of the RD for  
44  
45 statistically significant outcome measures.  
46  
47

48  
49 *Unit of analyses issues.* For trials presenting data from more than one treatment  
50  
51 period (e.g. 26 and 52 weeks), data from the longest treatment period will be used.  
52  
53 Based on the primary outcome measure, only data from the first period of cross-over  
54  
55 trials will be used.  
56  
57  
58  
59  
60

1  
2  
3  
4 *Dealing with missing data.* Intention-to-treat analyses including all patients  
5  
6 randomised will be performed. In the case of patients with missing outcome data,  
7  
8 carry forward of the last observed response will be used. Individual patient data will  
9  
10 be sought from the original source or from the published trial reports where individual  
11  
12 patient data are unavailable.  
13

## 14 15 16 17 18 19 **ETHICS AND DISSEMINATION**

20  
21  
22 The study will evaluate the clinical effect of SGLT-2i in patients with type 2 diabetes  
23  
24 based on the available published and unpublished clinical trial data and thereby  
25  
26 potentially improve the clinical knowledge on and management of type 2 diabetes.  
27  
28  
29  
30  
31

## 32 **CONTRIBUTORS**

33  
34  
35 HS, LLG, MC and TV participated in the conception and design of this protocol  
36  
37 including search strategy development. LLG provided statistical advice for the  
38  
39 design. HS prepared the draft and all authors reviewed the manuscript and approved  
40  
41 the final version.  
42  
43  
44  
45  
46  
47  
48  
49  
50

## 51 **FUNDING**

52  
53  
54 TV and FKK are supported by unrestricted grants from Novo Nordisk Foundation.  
55  
56 The research did not otherwise receive specific grant from any funding agency in the  
57  
58  
59  
60

1  
2  
3  
4 public, commercial or not-for-profit sectors. No sponsor was involved in the study  
5  
6 design, and no sponsor will have authority in collection, management, analysis and  
7  
8 interpretation of data.  
9

### 10 11 12 13 14 **COMPETING INTERESTS**

15  
16  
17 The authors declare no conflict of interests in relation to the present article.  
18  
19

### 20 21 22 **PROVENANCE AND PEER REVIEW**

23  
24  
25 Not commissioned; externally peer reviewed.  
26  
27  
28  
29  
30  
31  
32  
33  
34  
35  
36  
37  
38  
39  
40  
41  
42  
43  
44  
45  
46  
47  
48  
49  
50  
51  
52  
53  
54  
55  
56  
57  
58  
59  
60

## REFERENCES

1. DeFronzo RA. From the Triumvirate to the Ominous Octet: A New Paradigm for the Treatment of Type 2 Diabetes Mellitus. *Diabetes* 2009;58:773–95.
2. Gaede P, Vedel P, Larsen N, *et al.* Multifactorial intervention and cardiovascular disease in patients with type 2 diabetes. *N Engl J Med* 2003;348:383–93.
3. Stratton IM, Adler AI, Neil HA, *et al.* Association of glycaemia with macrovascular and microvascular complications of type 2 diabetes (UKPDS 35): prospective observational study. *BMJ* 2000;321:405–12.
4. Action to Control Cardiovascular Risk in Diabetes Study Group, Gerstein HC, Miller ME, *et al.* Effects of intensive glucose lowering in type 2 diabetes. *N Engl J Med* 2008;358:2545–59.
5. ADVANCE Collaborative Group, Patel A, MacMahon S, *et al.* Intensive blood glucose control and vascular outcomes in patients with type 2 diabetes. *N Engl J Med* 2008;358:2560–72.
6. Duckworth W, Abraira C, Moritz T, *et al.* Glucose control and vascular complications in veterans with type 2 diabetes. *N Engl J Med* 2009;360:129–39.
7. Holman RR, Paul SK, Bethel MA, *et al.* 10-year follow-up of intensive glucose control in type 2 diabetes. *N Engl J Med* 2008;359:1577–89.
8. Inzucchi SE, Bergenstal RM, Buse JB, *et al.* Management of hyperglycaemia in type 2 diabetes: a patient-centered approach. Position statement of the American Diabetes Association (ADA) and the European Association for the Study of Diabetes (EASD). *Diabetologia* 2012;55:1577–96.
9. Ferrannini E, Solini A. SGLT2 inhibition in diabetes mellitus: rationale and clinical prospects. *Nat Rev Endocrinol* 2012;8:495–502.
10. Ferrannini E, Ramos SJ, Salsali A, *et al.* Dapagliflozin monotherapy in type 2 diabetic patients with inadequate glycemic control by diet and exercise: a randomized, double-blind, placebo-controlled, phase 3 trial. *Diabetes Care* 2010;33:2217–24.
11. Rosenstock J, Aggarwal N, Polidori D, *et al.* Dose-ranging effects of canagliflozin, a sodium-glucose cotransporter 2 inhibitor, as add-on to metformin in subjects with type 2 diabetes. *Diabetes Care* 2012;35:1232–8.
12. Häring H-U, Merker L, Seewaldt-Becker E, *et al.* Empagliflozin As Add-on to Metformin Plus Sulfonylurea in Patients With Type 2 Diabetes: A 24-week,

1  
2  
3  
4 randomized, double-blind, placebo-controlled trial. *Diabetes Care* Published  
5 Online First: 20 August 2013.  
6

- 7  
8 13. Kovacs CS, Seshiah V, Swallow R, *et al.* Empagliflozin improves glycaemic and  
9 weight control as add-on therapy to pioglitazone or pioglitazone plus metformin in  
10 patients with type 2 diabetes: a 24-week, randomized, placebo-controlled trial.  
11 *Diabetes Obes Metab* Published Online First: 1 August 2013.  
12
- 13 14. Wilding JPH, Woo V, Rohwedder K, *et al.* Dapagliflozin in patients with type 2  
14 diabetes receiving high doses of insulin: efficacy and safety over 2 years.  
15 *Diabetes Obes Metab* Published Online First: 1 August 2013.  
16
- 17 15. EMDAC FDA Backgrounder - UCM378076.pdf. [http://www.fda.gov/downloads/  
18 AdvisoryCommittees/CommitteesMeetingMaterials/Drugs/EndocrinologicandMeta  
19 bolicDrugsAdvisoryCommittee/UCM378076.pdf](http://www.fda.gov/downloads/AdvisoryCommittees/CommitteesMeetingMaterials/Drugs/EndocrinologicandMetabolicDrugsAdvisoryCommittee/UCM378076.pdf)  
20  
21
- 22 16. UCM334550.pdf. [http://www.fda.gov/downloads/AdvisoryCommittees/Committees  
23 MeetingMaterials/Drugs/EndocrinologicandMetabolicDrugsAdvisoryCommittee/U  
24 CM334550.pdf](http://www.fda.gov/downloads/AdvisoryCommittees/CommitteesMeetingMaterials/Drugs/EndocrinologicandMetabolicDrugsAdvisoryCommittee/UCM334550.pdf)  
25  
26
- 27 17. Forxiga, INN-dapagliflozin - WC500136024.pdf. [http://www.ema.europa.eu/docs/  
28 en\\_GB/document\\_library/EPAR\\_-\\_Public\\_assessment\\_report/human/  
29 002322/WC500136024.pdf](http://www.ema.europa.eu/docs/en_GB/document_library/EPAR_-_Public_assessment_report/human/002322/WC500136024.pdf)  
30  
31
- 32 18. Invokana\_-\_CHMP\_AR - final - WC500156457.pdf. [http://www.ema.europa.eu/  
33 docs/en\\_GB/document\\_library/EPAR\\_-\\_Public\\_assessment\\_report/human/  
34 002649/WC500156457.pdf](http://www.ema.europa.eu/docs/en_GB/document_library/EPAR_-_Public_assessment_report/human/002649/WC500156457.pdf)  
35  
36
- 37 19. Moher D, Liberati A, Tetzlaff J, *et al.* Preferred reporting items for systematic  
38 reviews and meta-analyses: the PRISMA statement. *BMJ* 2009;339:b2535.  
39
- 40 20. ICTRP Search Portal. [http://apps.who.int/trialsearch/  
41](http://apps.who.int/trialsearch/)
- 42 21. Wood L, Egger M, Gluud LL, *et al.* Empirical evidence of bias in treatment effect  
43 estimates in controlled trials with different interventions and outcomes: meta-  
44 epidemiological study. *BMJ* 2008;336:601–5.  
45
- 46 22. Review Manager (RevMan) [Computer program]. Version 5.1. Copenhagen: The  
47 Nordic Cochrane Centre, The Cochrane Collaboration, 2011.  
48  
49  
50  
51  
52  
53  
54  
55  
56  
57  
58  
59  
60

# BMJ Open

## The effects of sodium-glucose co-transporter 2 inhibitors in patients with type 2 diabetes: protocol for a systematic review with meta-analysis of randomised trials

|                                 |                                                                                                                                                                                                                                                                                                                                                                                                                                                                                                                                              |
|---------------------------------|----------------------------------------------------------------------------------------------------------------------------------------------------------------------------------------------------------------------------------------------------------------------------------------------------------------------------------------------------------------------------------------------------------------------------------------------------------------------------------------------------------------------------------------------|
| Journal:                        | <i>BMJ Open</i>                                                                                                                                                                                                                                                                                                                                                                                                                                                                                                                              |
| Manuscript ID:                  | bmjopen-2014-005378.R1                                                                                                                                                                                                                                                                                                                                                                                                                                                                                                                       |
| Article Type:                   | Protocol                                                                                                                                                                                                                                                                                                                                                                                                                                                                                                                                     |
| Date Submitted by the Author:   | 11-Jun-2014                                                                                                                                                                                                                                                                                                                                                                                                                                                                                                                                  |
| Complete List of Authors:       | Storgaard, Heidi; Gentofte Hospital, University of Copenhagen, Center for Diabetes Research, Department of Internal Medicine<br>Glud, Lise; Department of Gastroenterology, Christensen, Mikkel; Bispebjerg Hospital, University of Copenhagen, Department of Clinical Pharmacology<br>Knop, Filip; Gentofte Hospital, University of Copenhagen, Center for Diabetes Research, Department of Internal Medicine<br>Vilsbøll, Tina; Gentofte Hospital, University of Copenhagen, Center for Diabetes Research, Department of Internal Medicine |
| <b>Primary Subject Heading</b>: | Diabetes and endocrinology                                                                                                                                                                                                                                                                                                                                                                                                                                                                                                                   |
| Secondary Subject Heading:      | Pharmacology and therapeutics                                                                                                                                                                                                                                                                                                                                                                                                                                                                                                                |
| Keywords:                       | Type 2 diabetes, meta-analysis, sodium-glucose co-transporter 2 inhibitor, ORAL MEDICINE                                                                                                                                                                                                                                                                                                                                                                                                                                                     |
|                                 |                                                                                                                                                                                                                                                                                                                                                                                                                                                                                                                                              |

SCHOLARONE™  
Manuscripts

only



1  
2  
3  
4 **The effects of sodium-glucose co-transporter 2 inhibitors in patients with type**  
5  
6 **2 diabetes: protocol for a systematic review with meta-analysis of randomised**  
7  
8 **trials**  
9

10  
11  
12 *Heidi Storgaard<sup>1</sup>, Lise L. Gluud<sup>2</sup>, Mikkel Christensen<sup>1,3</sup>, Filip K. Knop<sup>1,4</sup>, Tina Vilsbøll<sup>1</sup>*  
13  
14

15  
16 <sup>1</sup>Diabetes Research Division, Department of Medicine, Gentofte Hospital, University  
17 of Copenhagen, Hellerup, Denmark; <sup>2</sup>Gastrounit, Hvidovre Hospital, University of  
18 Copenhagen, Hvidovre, Denmark; <sup>3</sup>Department of Clinical Pharmacology, Bispebjerg  
19 Hospital, University of Copenhagen, Copenhagen, Denmark; <sup>4</sup>Department of  
20 Biomedical Sciences, Faculty of Health and Medical Sciences, University of  
21 Copenhagen, Copenhagen, Denmark  
22  
23

24  
25  
26  
27  
28  
29  
30  
31 Correspondence to:  
32 Heidi Storgaard, MD PhD  
33 Diabetes Research Division, Department of Medicine  
34 Gentofte Hospital, University of Copenhagen  
35 Niels Andersens Vej 65  
36 DK-2900 Hellerup  
37 Denmark  
38 Phone: +4539773711 ; Fax: +45 3977 7661; e-mail: heidi.storgaard@regionh.dk  
39  
40

41  
42 Keywords: sodium-glucose co-transporter 2 inhibitors, type 2 diabetes, meta-  
43 analyses, oral medicine  
44

45 Word count (excluding title page, abstract and references): 1752  
46  
47  
48  
49  
50  
51  
52  
53  
54  
55  
56  
57  
58  
59  
60

## Abstract

**Introduction:** Sodium glucose co-transporter 2 inhibitors (SGLT-2i) increase urinary glucose excretion through a reduced renal glucose reabsorption. We plan to perform a systematic review of SGLT-2i for treatment of type 2 diabetes.

**Methods and analysis:** A systematic review with meta-analyses of randomised clinical trials on SGLT-2i versus placebo, other oral glucose lowering drugs or insulin for patients with type 2 diabetes will be performed. The primary endpoint will be HbA1c. Secondary endpoints will include changes in body weight, body mass index, fasting plasma glucose, plasma cholesterol, kidney and liver blood tests, blood pressure, and adverse events. Electronic (The Cochrane Library, MEDLINE, EMBASE, and Science Citation Index) and manual searches will be performed. Meta-analyses will be performed and the results presented as mean differences for continuous outcomes and risk differences for dichotomous outcomes, both with 95% confidence intervals (CI). Subgroup, sensitivity, regression and sequential analyses will be performed to evaluate inter-trial heterogeneity, bias and the robustness of the results due to cumulative testing.

**Ethics and dissemination:** The study will contribute to the knowledge regarding the beneficial and harmful effects of SGLT-2i in patients with type 2 diabetes. We plan to publish the study irrespective of the results.

**Results:** The study will be disseminated by peerreview publication and conference presentation.

**Protocol registration:** PROSPERO CRD42014008960

## ARTICLE SUMMARY

### *Article focus*

Impact of sodium-glucose co-transporter 2 inhibitors (SGLT-2i) on glycaemic control (hbA1c), effects on fasting plasma glucose, body weight (body mass index, BMI), lipids, liver and kidney blood tests, blood pressure and adverse events in patients with type 2 diabetes.

### *Key messages*

A systematic review with meta-analysis on the glucose-lowering effect and safety of SGLT-2i in patients with type 2 diabetes in clinically relevant daily doses is lacking. Individualised treatment is recommended and new and safe drugs with alternative modes of action are needed for patients with type 2 diabetes to reach their treatment goals.

### *Strengths and limitations of this study*

We have the knowledge and experience within our group on how to conduct a systemic review and meta-analysis. A possible limitation might be the access to data from the randomised clinical trials we plan to include in the study.

only

## INTRODUCTION

Type 2 diabetes is a metabolic disease associated with obesity, dyslipidaemia and hypertension. Patients with type 2 diabetes are characterised by defective insulin secretion, insulin resistance, inappropriate glucagon secretion and an impaired incretin effect resulting in fasting and postprandial hyperglycaemia [1]. Hyperglycaemia with elevated levels of glycated haemoglobin A<sub>1c</sub> (HbA<sub>1c</sub>) predicts micro- and macrovascular complications [2]. Although improved metabolic control is associated with reduced morbidity and mortality [3], recent studies show that intensive glucose lowering treatments may harm some patients [4–7]. As a consequence the American Diabetes Association (ADA) and the European Association for the Study of Diabetes (EASD) recommends individualisation of the treatment [8]. Drugs with complementary mechanisms of action are recommended with metformin as first-line therapy. As  $\beta$  cell function declines, a number of patients fail to achieve their glycaemic target and maintenance of glucose control often necessitates several add-on therapies [8]. Current oral medications endorsed by ADA and EASD treatment algorithms for treating patients with type 2 diabetes i.e. metformin, sulphonylureas, dipeptidyl peptidase 4 inhibitors and thiazolidinediones act by increasing insulin secretion or sensitizing tissues to insulin action. Treatment strategies with insulin-independent pathways could therefore be advantageous.

Sodium-glucose co-transporter 2 inhibitors (SGLT-2i) represent a new class of drugs that inhibit glucose reabsorption in the proximal tubules of the kidneys. As a result, urinary glucose excretion is increased, which in turn reduces the amount of circulating glucose and improves glycaemic control. The effect is not associated with insulin secretion or action [9].

1  
2  
3  
4 In clinical trials, SGLT-2i (in monotherapy or combined with metformin,  
5 sulphonylureas, pioglitazone, or insulin) seems to improve glycaemic control in type 2  
6 diabetes [10–14]. In 2013 and 2014, two SGLT-2i, canagliflozin and dapagliflozin,  
7  
8 were approved by the United States Food and Drug Administration (FDA) [15,16] and  
9  
10 the European Medicine Agency (EMA) for the treatment of patients with type 2  
11  
12 diabetes [17,18]. None of the individual clinical trials on SGLT-2i provide definite  
13  
14 conclusions regarding efficacy and safety and so far current guidelines for the  
15  
16 management of type 2 diabetes do not include SGLT-2i [8]. In order to provide robust  
17  
18 evidence for the efficacy and safety of SGLT-2i we plan to perform a systematic  
19  
20 review with meta-analyses of randomised controlled trials (RCTs). Unlike previous  
21  
22 systematic reviews, we plan to include focus on trials assessing on SGLT-2i in doses  
23  
24 that are recommended for clinical practice.  
25  
26  
27  
28  
29  
30  
31

## 32 **OBJECTIVES**

33  
34  
35  
36 The primary objective of this systematic review is to evaluate the effects of SGLT-2i  
37  
38 that are approved (dapagliflozin and canagliflozin) or is in late clinical development  
39  
40 (empagliflozin). To increase external validity, we plan to only include trials with  
41  
42 clinically relevant daily doses (canagliflozin 300 mg, dapagliflozin 10 mg and  
43  
44 empagliflozin 25 mg). Our primary objective will be to assess the impact on  
45  
46 glycaemic control (HbA<sub>1c</sub>).  
47  
48  
49  
50  
51  
52  
53  
54  
55  
56  
57  
58  
59  
60

## METHODS

The reporting of the review will follow the preferred reporting items for systematic reviews and meta-analysis (PRISMA) statement [19] .

### ***Criteria for considering studies for this review***

*Studies.* The review will include RCTs irrespective of blinding and language..

*Participants.* Adult patients (at least 18 years of age) of both genders with type 2 diabetes will be included.

*Interventions.* The intervention comparisons will constitute SGLT-2i (dapagliflozin, canagliflozin and empagliflozin) versus placebo, other anti-diabetic drugs or insulin. Co-interventions with other anti-diabetic agents will be allowed if administered to both the intervention and control group.

### ***Types of outcome measures***

The following outcome measures will be assessed

#### *Primary outcome measure*

- HbA<sub>1c</sub>

#### *Secondary outcome measures*

- Body weight and BMI
- Fasting plasma glucose
- Low density lipoprotein (LDL)-cholesterol

- Systolic and diastolic blood pressure
- Liver and kidney blood tests
- Adverse events

### ***Search methods for identification of studies***

All authors will participate in the identification and selection of trials. Excluded trials will be listed with the reason for exclusion. Authors will extract data in an independent manner. Eligible trials will be identified through electronic and manual searches. Electronic searches will be performed in MEDLINE ((Sodium-glucose [All Fields] AND co-transporter [All Fields]) OR ("2-(3-(4-ethoxybenzyl)-4-chlorophenyl)-6-hydroxymethyltetrahydro-2H-pyran-3,4,5-triol" [Supplementary Concept] OR "2-(3-(4-ethoxybenzyl)-4-chlorophenyl)-6-hydroxymethyltetrahydro-2H-pyran-3,4,5-triol" [All Fields] OR "dapagliflozin" [All Fields]) OR ("canagliflozin"[Supplementary Concept] OR "canagliflozin" [All Fields]) OR ("empagliflozin" [Supplementary Concept] OR "empagliflozin" [All Fields]) OR Remogliflozin [All Fields] OR ("sergliflozin" [Supplementary Concept] OR "sergliflozin" [All Fields]) OR ("6-((4-ethylphenyl)methyl)-3',4',5',6'-tetrahydro-6'-(hydroxymethyl)spiro(isobenzofuran-1(3H),2'-(2H)pyran)-3',4',5'-triol" [Supplementary Concept] OR "6-((4-ethylphenyl)methyl)-3',4',5',6'-tetrahydro-6'-(hydroxymethyl)spiro(isobenzofuran-1(3H),2'-(2H)pyran)-3',4',5'-triol" [All Fields] OR "tofogliflozin" [All Fields])), Cochrane Library, Embase and Web of science. Additional manual searches will be performed in reference lists of relevant papers, correspondence with experts, the pharmaceutical companies producing SGLT-2i and the World Health Organisation Trial Search Database [20].

### ***Data collection and analysis***

Two authors (HS and MC) will independently extract data and resolve disagreements through discussion before analysis. In the case of unresolved matters, a third party (TV, FK or LLG) will be involved. If necessary data are not included in the published trial reports, authors of included trials will be contacted for additional information.

### ***Selection of studies***

Trials identified through the searches will be listed and selected for inclusion according to the above mentioned criteria.

### ***Data extraction***

Extraction forms developed for the study will be used and the following data will be extracted: Trial characteristics (number of clinical sites, country of origin and funding), intervention characteristics (type, dose and duration of interventions applied), patient characteristics (inclusion criteria, background treatment, mean age, proportion of men, duration of type 2 diabetes, body weight, BMI, baseline systolic and diastolic blood pressure baseline HbA<sub>1c</sub>, baseline blood tests, fasting plasma glucose, LDL-cholesterol, alanine amino transferase, alkaline phosphatase, creatinine and urate.

### ***Assessment of risk of bias in included studies***

The bias risk assessment will follow the recommendations described in the Cochrane Handbook for Reviews of Interventions and includes:



- Randomisation (selection bias): the randomisation methods will be extracted as the primary measure of bias control [21]. Methodological quality in the randomisation methods will be based on the allocation sequence generation (adequate if based on a table of random numbers, computer-generated random numbers or similar) and allocation concealment (adequate if randomisation was performed through serially numbered opaque sealed envelopes, a central independent unit, identically appearing coded drug containers or similar).
- Blinding (performance and detection bias): we will extract data on whether single or double blinding was performed, the method of blinding (e.g., use of placebo) and the persons who were blinded with regard to the interventions assessed (e.g., health care providers or patients).
- Incomplete outcome data (attrition bias): the extent to which all patients lost to follow-up are accounted for.
- Outcome reporting (reporting bias): the extent to which clinically relevant outcome measures are reported and differences between trial protocols and subsequent reports will be evaluated as a marker of reporting bias.
- Other bias: any other apparent biases will be evaluated.

### ***Statistical analyses***

The analyses will be performed in RevMan [22] and Stata Version 13 (STATA Corp, College Station, Texas, US). Analyses will be based on individual patient data when available or on published data.  $I^2$  will be used as a measure of heterogeneity.  $I^2$

1  
2  
3  
4 values below 30% will be defined as unimportant, 30-50% as moderate  
5  
6 heterogeneity, 50-75% as substantial heterogeneity and  $I^2$  values >75% will be  
7  
8 defined as considerable heterogeneity. Irrespective of the statistical heterogeneity,  
9  
10 both fixed effect and random effects models will be used to test the robustness of the  
11  
12 results. We will only report the results of the random effects meta-analyses if the  
13  
14 results differ from the fixed effect models. Publication bias and other small study  
15  
16 effects will be evaluated based on regression analysis (Egger's or Harbord's test).  
17  
18

19  
20 Subgroup analyses will be performed to evaluate sources of heterogeneity.  
21  
22 Differences between subgroups will be explored using tests for subgroup differences  
23  
24 expressed as  $p$  values. The subgroup analyses will evaluate the influence of the type  
25  
26 of data (individual patient data or published data), the control groups, collateral  
27  
28 interventions, glycaemic control at baseline, duration of diabetes, baseline  
29  
30 bodyweight (outcomes will be recalculated for patients who are normal weight  
31  
32 defined as a maximum BMI of 25 kg/m<sup>2</sup> at the time of randomisation) and publication  
33  
34 status and bias control.  
35  
36

37  
38  
39 *Measures of treatment effect.* Dichotomous data will be analysed using risk  
40  
41 differences (RD) and continuous data using mean differences, both with 95% CIs.  
42  
43 The number needed to treat will be calculated as the inverse of the RD for  
44  
45 statistically significant outcome measures.  
46  
47

48  
49 *Unit of analyses issues.* For trials presenting data from more than one treatment  
50  
51 period (e.g. 26 and 52 weeks), data from the longest treatment period will be used.  
52  
53 Based on the primary outcome measure, only data from the first period of cross-over  
54  
55 trials will be used.  
56  
57  
58  
59  
60

1  
2  
3  
4 *Dealing with missing data.* Intention-to-treat analyses including all patients  
5  
6 randomised will be performed. In the case of patients with missing outcome data,  
7  
8 carry forward of the last observed response will be used. Individual patient data will  
9  
10 be sought from the original source or from the published trial reports where individual  
11  
12 patient data are unavailable.  
13

### 14 15 16 17 18 19 **ETHICS AND DISSEMINATION**

20  
21  
22 The study will evaluate the clinical effect of SGLT-2i in patients with type 2 diabetes  
23  
24 based on the available published and unpublished clinical trial data and thereby  
25  
26 potentially improve the clinical knowledge on and management of type 2 diabetes.  
27  
28  
29  
30  
31  
32  
33  
34  
35  
36  
37  
38  
39  
40  
41  
42  
43  
44  
45  
46  
47  
48  
49  
50  
51  
52  
53  
54  
55  
56  
57  
58  
59  
60

## CONTRIBUTORS

HS, LLG, MC and TV participated in the conception and design of this protocol including search strategy development. LLG provided statistical advice for the design. HS prepared the draft and all authors reviewed the manuscript and approved the final version.

## FUNDING

TV and FKK are supported by unrestricted grants from Novo Nordisk Foundation. The research did not otherwise receive specific grant from any funding agency in the public, commercial or not-for-profit sectors. No sponsor was involved in the study design, and no sponsor will have authority in collection, management, analysis and interpretation of data.

## COMPETING INTERESTS

The authors declare no conflict of interests in relation to the present article.

## PROVENANCE AND PEER REVIEW

Not commissioned; externally peer reviewed.

## REFERENCES

1. DeFronzo RA. From the Triumvirate to the Ominous Octet: A New Paradigm for the Treatment of Type 2 Diabetes Mellitus. *Diabetes* 2009;58:773–95.
2. Gaede P, Vedel P, Larsen N, *et al.* Multifactorial intervention and cardiovascular disease in patients with type 2 diabetes. *N Engl J Med* 2003;348:383–93.
3. Stratton IM, Adler AI, Neil HA, *et al.* Association of glycaemia with macrovascular and microvascular complications of type 2 diabetes (UKPDS 35): prospective observational study. *BMJ* 2000;321:405–12.
4. Action to Control Cardiovascular Risk in Diabetes Study Group, Gerstein HC, Miller ME, *et al.* Effects of intensive glucose lowering in type 2 diabetes. *N Engl J Med* 2008;358:2545–59.
5. ADVANCE Collaborative Group, Patel A, MacMahon S, *et al.* Intensive blood glucose control and vascular outcomes in patients with type 2 diabetes. *N Engl J Med* 2008;358:2560–72.
6. Duckworth W, Abraira C, Moritz T, *et al.* Glucose control and vascular complications in veterans with type 2 diabetes. *N Engl J Med* 2009;360:129–39.
7. Holman RR, Paul SK, Bethel MA, *et al.* 10-year follow-up of intensive glucose control in type 2 diabetes. *N Engl J Med* 2008;359:1577–89.
8. Inzucchi SE, Bergenstal RM, Buse JB, *et al.* Management of hyperglycaemia in type 2 diabetes: a patient-centered approach. Position statement of the American Diabetes Association (ADA) and the European Association for the Study of Diabetes (EASD). *Diabetologia* 2012;55:1577–96.
9. Ferrannini E, Solini A. SGLT2 inhibition in diabetes mellitus: rationale and clinical prospects. *Nat Rev Endocrinol* 2012;8:495–502.
10. Ferrannini E, Ramos SJ, Salsali A, *et al.* Dapagliflozin monotherapy in type 2 diabetic patients with inadequate glycemic control by diet and exercise: a randomized, double-blind, placebo-controlled, phase 3 trial. *Diabetes Care* 2010;33:2217–24.
11. Rosenstock J, Aggarwal N, Polidori D, *et al.* Dose-ranging effects of canagliflozin, a sodium-glucose cotransporter 2 inhibitor, as add-on to metformin in subjects with type 2 diabetes. *Diabetes Care* 2012;35:1232–8.
12. Häring H-U, Merker L, Seewaldt-Becker E, *et al.* Empagliflozin As Add-on to Metformin Plus Sulfonylurea in Patients With Type 2 Diabetes: A 24-week,

1  
2  
3  
4 randomized, double-blind, placebo-controlled trial. *Diabetes Care* Published  
5 Online First: 20 August 2013.  
6

- 7  
8 13. Kovacs CS, Seshiah V, Swallow R, *et al.* Empagliflozin improves glycaemic and  
9 weight control as add-on therapy to pioglitazone or pioglitazone plus metformin in  
10 patients with type 2 diabetes: a 24-week, randomized, placebo-controlled trial.  
11 *Diabetes Obes Metab* Published Online First: 1 August 2013.  
12  
13 14. Wilding JPH, Woo V, Rohwedder K, *et al.* Dapagliflozin in patients with type 2  
14 diabetes receiving high doses of insulin: efficacy and safety over 2 years.  
15 *Diabetes Obes Metab* Published Online First: 1 August 2013.  
16  
17 15. EMDAC FDA Backgrounder - UCM378076.pdf. [http://www.fda.gov/downloads/  
18 AdvisoryCommittees/CommitteesMeetingMaterials/Drugs/EndocrinologicandMeta  
19 bolicDrugsAdvisoryCommittee/UCM378076.pdf](http://www.fda.gov/downloads/AdvisoryCommittees/CommitteesMeetingMaterials/Drugs/EndocrinologicandMetabolicDrugsAdvisoryCommittee/UCM378076.pdf)  
20  
21 16. UCM334550.pdf. [http://www.fda.gov/downloads/AdvisoryCommittees/Committees  
22 MeetingMaterials/Drugs/EndocrinologicandMetabolicDrugsAdvisoryCommittee/U  
23 CM334550.pdf](http://www.fda.gov/downloads/AdvisoryCommittees/CommitteesMeetingMaterials/Drugs/EndocrinologicandMetabolicDrugsAdvisoryCommittee/UCM334550.pdf)  
24  
25 17. Forxiga, INN-dapagliflozin - WC500136024.pdf. [http://www.ema.europa.eu/docs/  
26 en\\_GB/document\\_library/EPAR\\_-\\_Public\\_assessment\\_report/human/  
27 002322/WC500136024.pdf](http://www.ema.europa.eu/docs/en_GB/document_library/EPAR_-_Public_assessment_report/human/002322/WC500136024.pdf)  
28  
29 18. Invokana\_-\_CHMP\_AR - final - WC500156457.pdf. [http://www.ema.europa.eu/  
30 docs/en\\_GB/document\\_library/EPAR\\_-\\_Public\\_assessment\\_report/human/  
31 002649/WC500156457.pdf](http://www.ema.europa.eu/docs/en_GB/document_library/EPAR_-_Public_assessment_report/human/002649/WC500156457.pdf)  
32  
33 19. Moher D, Liberati A, Tetzlaff J, *et al.* Preferred reporting items for systematic  
34 reviews and meta-analyses: the PRISMA statement. *BMJ* 2009;339:b2535.  
35  
36 20. ICTRP Search Portal. [http://apps.who.int/trialsearch/  
37](http://apps.who.int/trialsearch/)  
38  
39 21. Wood L, Egger M, Gluud LL, *et al.* Empirical evidence of bias in treatment effect  
40 estimates in controlled trials with different interventions and outcomes: meta-  
41 epidemiological study. *BMJ* 2008;336:601–5.  
42  
43 22. Review Manager (RevMan) [Computer program]. Version 5.1. Copenhagen: The  
44 Nordic Cochrane Centre, The Cochrane Collaboration, 2011.  
45  
46  
47  
48  
49  
50  
51  
52  
53  
54  
55  
56  
57  
58  
59  
60

1  
2  
3  
4 **The effects of sodium-glucose co-transporter 2 inhibitors in patients with type**  
5  
6 **2 diabetes: protocol for a systematic review with meta-analysis of randomised**  
7  
8 **trials**  
9

10  
11  
12 *Heidi Storgaard<sup>1</sup>, Lise L. Gluud<sup>2</sup>, Mikkel Christensen<sup>1,3</sup>, Filip K. Knop<sup>1,4</sup>, Tina Vilsbøll<sup>1</sup>*  
13  
14

15  
16 <sup>1</sup>Center for Diabetes Research, Department of Medicine, Gentofte Hospital,  
17 University of Copenhagen, Hellerup, Denmark; <sup>2</sup>Gastrounit, Hvidovre Hospital,  
18 University of Copenhagen, Hvidovre, Denmark; <sup>3</sup>Department of Clinical  
19 Pharmacology, Bispebjerg Hospital, University of Copenhagen, Copenhagen,  
20 Denmark; <sup>4</sup>Department of Biomedical Sciences, Faculty of Health and Medical  
21 Sciences, University of Copenhagen, Copenhagen, Denmark  
22  
23  
24  
25  
26  
27  
28  
29  
30

31 Correspondence to:  
32 Heidi Storgaard, MD PhD  
33 Diabetes Research Division, Department of Medicine  
34 Gentofte Hospital, University of Copenhagen  
35 Niels Andersens Vej 65  
36 DK-2900 Hellerup  
37 Denmark  
38 Phone: +4539773711 ; Fax: +45 3977 7661; e-mail: heidi.storgaard@regionh.dk  
39  
40

41  
42 Keywords: sodium-glucose co-transporter 2 inhibitors, type 2 diabetes, meta-  
43 analyses, oral medicine  
44

45 Word count (excluding title page, abstract and references): 1806  
46  
47  
48  
49  
50  
51  
52  
53  
54  
55  
56  
57  
58  
59  
60

## ARTICLE SUMMARY

### *Article focus*

Impact of sodium-glucose co-transporter 2 inhibitors (SGLT-2i) on glycaemic control (hbA1c), effects on fasting plasma glucose, body weight (body mass index, BMI), lipids, liver and kidney blood tests, blood pressure and adverse events in patients with type 2 diabetes.

### *Key messages*

A systematic review with meta-analysis on the glucose-lowering effect and safety of SGLT-2i in patients with type 2 diabetes in clinically relevant daily doses is lacking. Individualised treatment is recommended and new and safe drugs with alternative modes of action are needed for patients with type 2 diabetes to reach their treatment goals.

### *Strengths and limitations of this study*

We have the knowledge and experience within our group on how to conduct a systemic review and meta-analysis. A possible limitation might be the access to data from the randomised clinical trials we plan to include in the study.



## ABSTRACT

**Introduction:** Sodium glucose co-transporter 2 inhibitors (SGLT-2i) increase urinary glucose excretion through a reduced renal glucose reabsorption. We plan to perform a systematic review of SGLT-2i for treatment of type 2 diabetes.

**Methods and analysis:** A systematic review with meta-analyses of randomised clinical trials on SGLT-2i versus placebo, other oral glucose lowering drugs or insulin for patients with type 2 diabetes will be performed. The primary endpoint will be HbA<sub>1c</sub>. Secondary endpoints will include changes in body weight, body mass index, fasting plasma glucose, plasma cholesterol, kidney and liver blood tests, blood pressure, and adverse events. Electronic (The Cochrane Library, MEDLINE, EMBASE, and Science Citation Index) and manual searches will be performed. Meta-analyses will be performed and the results presented as mean differences for continuous outcomes and risk differences for dichotomous outcomes, both with 95% confidence intervals (CI). Subgroup, sensitivity, regression and sequential analyses will be performed to evaluate inter-trial heterogeneity, bias and the robustness of the results due to cumulative testing.

**Ethics and dissemination:** The study will contribute to the knowledge regarding the beneficial and harmful effects of SGLT-2i in patients with type 2 diabetes. We plan to publish the study irrespective of the results.

**Results:** The study will be disseminated by peerreview publication and conference presentation.

**Protocol registration:** PROSPERO CRD42014008960

## INTRODUCTION

Type 2 diabetes is a metabolic disease associated with obesity, dyslipidaemia and hypertension. Patients with type 2 diabetes are characterised by defective insulin secretion, insulin resistance, inappropriate glucagon secretion and an impaired incretin effect resulting in fasting and postprandial hyperglycaemia [1]. Hyperglycaemia with elevated levels of glycated haemoglobin A<sub>1c</sub> (HbA<sub>1c</sub>) predicts micro- and macrovascular complications [2]. Although improved metabolic control is associated with reduced morbidity and mortality [3], recent studies show that intensive glucose lowering treatments may harm some patients [4–7]. As a consequence the American Diabetes Association (ADA) and the European Association for the Study of Diabetes (EASD) recommends individualisation of the treatment [8]. Drugs with complementary mechanisms of action are recommended with metformin as first-line therapy. As  $\beta$  cell function declines, a number of patients fail to achieve their glycaemic target and maintenance of glucose control often necessitates several add-on therapies [8]. Current oral medications endorsed by ADA and EASD treatment algorithms for treating patients with type 2 diabetes i.e. metformin, sulphonylureas, dipeptidyl peptidase 4 inhibitors and thiazolidinediones act by increasing insulin secretion or sensitizing tissues to insulin action. Treatment strategies with insulin-independent pathways could therefore be advantageous.

Sodium-glucose co-transporter 2 inhibitors (SGLT-2i) represent a new class of drugs that inhibit glucose reabsorption in the proximal tubules of the kidneys. As a result, urinary glucose excretion is increased, which in turn reduces the amount of circulating glucose and improves glycaemic control. The effect is not associated with insulin secretion or action [9].

1  
2  
3  
4 In clinical trials, SGLT-2i (in monotherapy or combined with metformin,  
5 sulphonylureas, pioglitazone, or insulin) seems to improve glycaemic control in type 2  
6 diabetes [10–14]. In 2013 and 2014, two SGLT-2i, canagliflozin and dapagliflozin,  
7  
8 were approved by the United States Food and Drug Administration (FDA) [15,16] and  
9  
10 the European Medicine Agency (EMA) for the treatment of patients with type 2  
11  
12 diabetes [17,18]. None of the individual clinical trials on SGLT-2i provide definite  
13  
14 conclusions regarding efficacy and safety and so far current guidelines for the  
15  
16 management of type 2 diabetes do not include SGLT-2i [8]. In order to provide robust  
17  
18 evidence for the efficacy and safety of SGLT-2i we plan to perform a systematic  
19  
20 review with meta-analyses of randomised controlled trials (RCTs). **Previous**  
21  
22 **systematic reviews on SGLT2i [19–24] used a pragmatic approach and included**  
23  
24 **trials irrespective of the dosing or duration of follow up. We restricted our analyses to**  
25  
26 **‘clinically relevant’ trials, i.e., trials assessing doses and interventions that we use in**  
27  
28 **clinical practice. We therefore limit our analyses to include trials on the**  
29  
30 **recommended daily dose, clinical relevant compounds, and with sufficient follow up**  
31  
32 **to assess the clinical effects. This approach means that smaller trials such as dose**  
33  
34 **finding trials will not be included. We believe that this approach will give the**  
35  
36 **evidence-based clinician a clearer and more useful answer. Doses that are not**  
37  
38 **clinical relevant may under- or overestimate beneficial and potential harmful effects**  
39  
40 **of SGLT-2i. Therefore, our results provide a more answer that may be used in clinical**  
41  
42 **practice.**  
43  
44  
45  
46  
47  
48  
49  
50  
51  
52  
53  
54  
55  
56  
57  
58  
59  
60

## OBJECTIVES

The primary objective of this systematic review is to evaluate the effects of SGLT-2i that are approved (dapagliflozin and canagliflozin) or is in late clinical development (empagliflozin) **in Europe and the United States of America**. To increase external validity, we plan to **evaluate doses that are currently recommended by FDA and/or EMA [17,25,26] as maximum daily dose and therefore only include trials with these daily doses** (canagliflozin 300 mg, dapagliflozin 10 mg and empagliflozin 25 mg). Our primary objective will be to assess the impact on glycaemic control (HbA<sub>1c</sub>).

## METHODS

The reporting of the review will follow the preferred reporting items for systematic reviews and meta-analysis (PRISMA) statement [27] .

### ***Criteria for considering studies for this review***

***Studies.*** The review will include RCTs irrespective of blinding and language..

***Participants.*** Adult patients (at least 18 years of age) of both genders with type 2 diabetes will be included.

***Duration.*** Because red blood cells survive for 8 – 12 weeks, the trials should last for **at least 12 weeks to evaluate the effect of SGLT-2i on HbA<sub>1c</sub>**

1  
2  
3  
4 *Interventions.* The intervention comparisons will constitute SGLT-2i (dapagliflozin,  
5  
6 canagliflozin and empagliflozin) versus placebo, other anti-diabetic drugs or insulin.  
7  
8 Co-interventions with other anti-diabetic agents will be allowed if administered to both  
9  
10 the intervention and control group.  
11

### 12 13 ***Types of outcome measures***

14  
15  
16 The following outcome measures will be assessed  
17

#### 18 19 *Primary outcome measure*

- 20  
21  
22 • HbA<sub>1c</sub>  
23

#### 24 25 *Secondary outcome measures*

- 26  
27  
28 • Body weight and BMI  
29
- 30  
31  
32 • Fasting plasma glucose  
33
- 34  
35 • Lipid profile (Low density lipoprotein (LDL)-cholesterol, high density lipoprotein  
36  
37 (HDL)-cholesterol, triglyceride)  
38
- 39  
40  
41 • Systolic and diastolic blood pressure  
42
- 43  
44 • Liver and kidney blood tests (creatinine, uric acid)  
45
- 46  
47 • Urinary albumin  
48
- 49  
50 • Adverse events (Any adverse events, urinary tract infections, genital tract  
51  
52 infections, hypoglycaemia, hypotension, total withdrawals)  
53

#### 54 55 ***Search methods for identification of studies***

1  
2  
3  
4 All authors will participate in the identification and selection of trials. Excluded trials  
5  
6 will be listed with the reason for exclusion. Authors will extract data in an independent  
7  
8 manner. Eligible trials will be identified through electronic and manual searches.  
9  
10 Electronic searches will be performed in MEDLINE ((Sodium-glucose [All Fields] AND  
11  
12 co-transporter [All Fields]) OR ("2-(3-(4-ethoxybenzyl)-4-chlorophenyl)-6-  
13  
14 hydroxymethyltetrahydro-2H-pyran-3,4,5-triol" [Supplementary Concept] OR "2-(3-(4-  
15  
16 ethoxybenzyl)-4-chlorophenyl)-6-hydroxymethyltetrahydro-2H-pyran-3,4,5-triol" [All  
17  
18 Fields] OR "dapagliflozin" [All Fields]) OR ("canagliflozin"[Supplementary Concept]  
19  
20 OR "canagliflozin" [All Fields]) OR ("empagliflozin" [Supplementary Concept] OR  
21  
22 "empagliflozin" [All Fields]) OR Remogliflozin [All Fields] OR ("sergliflozin"  
23  
24 [Supplementary Concept] OR "sergliflozin" [All Fields]) OR ("6-((4-  
25  
26 ethylphenyl)methyl)-3',4',5',6'-tetrahydro-6'-(hydroxymethyl)spiro(isobenzofuran-  
27  
28 1(3H),2'-(2H)pyran)-3',4',5'-triole" [Supplementary Concept] OR "6-((4-  
29  
30 ethylphenyl)methyl)-3',4',5',6'-tetrahydro-6'-(hydroxymethyl)spiro(isobenzofuran-  
31  
32 1(3H),2'-(2H)pyran)-3',4',5'-triole" [All Fields] OR "tofogliflozin" [All Fields])), Cochrane  
33  
34 Library, Embase and Web of science. Additional manual searches will be performed  
35  
36 in reference lists of relevant papers, correspondence with experts, the  
37  
38 pharmaceutical companies producing SGLT-2i and the World Health Organisation  
39  
40 Trial Search Database [28].  
41  
42  
43  
44  
45

### 46 47 **Data collection and analysis**

48  
49 Two authors (HS and MC) will independently extract data and resolve disagreements  
50  
51 through discussion before analysis. In the case of unresolved matters, a third party  
52  
53 (TV, FK or LLG) will be involved. If necessary data are not included in the published  
54  
55 trial reports, authors of included trials will be contacted for additional information.  
56  
57  
58  
59  
60

### ***Selection of studies***

Trials identified through the searches will be listed and selected for inclusion according to the above mentioned criteria.

### ***Data extraction***

Extraction forms developed for the study will be used and the following data will be extracted: Trial characteristics (number of clinical sites, country of origin and funding), intervention characteristics (type, dose and duration of interventions applied), patient characteristics (inclusion criteria, background treatment, mean age, proportion of men, duration of type 2 diabetes, body weight, BMI, baseline systolic and diastolic blood pressure baseline HbA<sub>1c</sub>, baseline blood tests, fasting plasma glucose, LDL-cholesterol, alanine amino transferase, alkaline phosphatase, creatinine and urate.

### ***Assessment of risk of bias in included studies***

The bias risk assessment will follow the recommendations described in the Cochrane Handbook for Reviews of Interventions and includes:

- Randomisation (selection bias): the randomisation methods will be extracted as the primary measure of bias control [29]. Methodological quality in the randomisation methods will be based on the allocation sequence generation (adequate if based on a table of random numbers, computer-generated random numbers or similar) and allocation concealment (adequate if randomisation was performed through serially numbered opaque sealed

1  
2  
3  
4 envelopes, a central independent unit, identically appearing coded drug  
5  
6 containers or similar).

- 7  
8
- 9 • Blinding (performance and detection bias): we will extract data on whether  
10 single or double blinding was performed, the method of blinding (e.g., use of  
11 placebo) and the persons who were blinded with regard to the interventions  
12 assessed (e.g., health care providers or patients).  
13
  - 14 • Incomplete outcome data (attrition bias): the extent to which all patients lost to  
15 follow-up are accounted for.  
16
  - 17 • Outcome reporting (reporting bias): the extent to which clinically relevant  
18 outcome measures are reported and differences between trial protocols and  
19 subsequent reports will be evaluated as a marker of reporting bias.  
20
  - 21 • Other bias: any other apparent biases will be evaluated.  
22  
23  
24  
25  
26  
27  
28  
29  
30  
31  
32

### 33 ***Statistical analyses***

34  
35  
36  
37  
38 The analyses will be performed in RevMan [30] and Stata Version 13 (STATA Corp,  
39 College Station, Texas, US). Analyses will be based on individual patient data when  
40 available or on published data.  $I^2$  will be used as a measure of heterogeneity.  $I^2$   
41 values below 30% will be defined as unimportant, 30-50% as moderate  
42 heterogeneity, 50-75% as substantial heterogeneity and  $I^2$  values >75% will be  
43 defined as considerable heterogeneity. Irrespective of the statistical heterogeneity,  
44 both fixed effect and random effects models will be used to test the robustness of the  
45 results. We will only report the results of the random effects meta-analyses if the  
46  
47  
48  
49  
50  
51  
52  
53  
54  
55  
56  
57  
58  
59  
60



1  
2  
3  
4 results differ from the fixed effect models. Publication bias and other small study  
5  
6 effects will be evaluated based on regression analysis (Egger's or Harbord's test).  
7  
8

9 **We plan to perform subgroup and meta-regression analyses based on treatment**  
10 **combinations as well as baseline patient characteristics.** Differences between  
11 subgroups will be explored using tests for subgroup differences expressed as  $p$   
12 values. The subgroup analyses will evaluate the influence of the type of data  
13 (individual patient data or published data), the control groups (**stratified by the type of**  
14 **intervention allocated to the control group**), collateral interventions (**interventions**  
15 **administered to both allocation groups**), **We will also perform meta-regression**  
16 **analyses to evaluate the potential influence of** glycaemic control at baseline, duration  
17 of diabetes, and baseline bodyweight. **In sensitivity analyses, we will evaluate the**  
18 **intervention effect in patients who are normal weight (defined as a maximum BMI of**  
19 **25 kg/m<sup>2</sup> at the time of randomisation), trials published as full paper articles and trials**  
20 **with a low risk of bias.**  
21  
22  
23  
24  
25  
26  
27  
28  
29  
30  
31  
32  
33  
34  
35

36 *Measures of treatment effect.* Dichotomous data will be analysed using risk  
37 differences (RD) and continuous data using mean differences, both with 95% CIs.  
38  
39

40 *Unit of analyses issues.* For trials presenting data from more than one treatment  
41 period (e.g. 26 and 52 weeks), data from the longest treatment period will be used.  
42  
43 Based on the primary outcome measure, only data from the first period of cross-over  
44 trials will be used.  
45  
46  
47  
48  
49

50 *Dealing with missing data.* Intention-to-treat analyses including all patients  
51 randomised will be performed. **For patients with missing data, we will perform**  
52  
53  
54  
55  
56  
57  
58  
59  
60

1  
2  
3  
4 sensitivity analyses with simple imputation (counting patients as failures or  
5  
6 successes).  
7  
8  
9

## 10 11 12 **ETHICS AND DISSEMINATION** 13

14  
15 The study will evaluate the clinical effect of SGLT-2i in patients with type 2 diabetes  
16 based on the available published and unpublished clinical trial data and thereby  
17 potentially improve the clinical knowledge on and management of type 2 diabetes.  
18  
19  
20  
21  
22  
23  
24

## 25 26 **CONTRIBUTORS** 27

28  
29 HS, LLG, MC and TV participated in the conception and design of this protocol  
30 including search strategy development. LLG provided statistical advice for the  
31 design. HS prepared the draft and all authors reviewed the manuscript and approved  
32 the final version.  
33  
34  
35  
36  
37  
38  
39  
40

## 41 42 **FUNDING** 43

44  
45 TV and FKK are supported by unrestricted grants from Novo Nordisk Foundation.  
46 The research did not otherwise receive specific grant from any funding agency in the  
47 public, commercial or not-for-profit sectors. No sponsor was involved in the study  
48 design, and no sponsor will have authority in collection, management, analysis and  
49 interpretation of data.  
50  
51  
52  
53  
54  
55  
56  
57  
58  
59  
60

1  
2  
3  
4  
5  
6  
7  
8  
9  
10  
11  
12  
13  
14  
15  
16  
17  
18  
19  
20  
21  
22  
23  
24  
25  
26  
27  
28  
29  
30  
31  
32  
33  
34  
35  
36  
37  
38  
39  
40  
41  
42  
43  
44  
45  
46  
47  
48  
49  
50  
51  
52  
53  
54  
55  
56  
57  
58  
59  
60

**COMPETING INTERESTS**

The authors declare no conflict of interests in relation to the present article.

**PROVENANCE AND PEER REVIEW**

Not commissioned; externally peer reviewed.

For peer review only

## REFERENCES

1. DeFronzo RA. From the Triumvirate to the Ominous Octet: A New Paradigm for the Treatment of Type 2 Diabetes Mellitus. *Diabetes* 2009;**58**:773–95.
2. Gaede P, Vedel P, Larsen N, *et al*. Multifactorial intervention and cardiovascular disease in patients with type 2 diabetes. *N Engl J Med* 2003;**348**:383–93.
3. Stratton IM, Adler AI, Neil HA, *et al*. Association of glycaemia with macrovascular and microvascular complications of type 2 diabetes (UKPDS 35): prospective observational study. *BMJ* 2000;**321**:405–12.
4. Action to Control Cardiovascular Risk in Diabetes Study Group, Gerstein HC, Miller ME, *et al*. Effects of intensive glucose lowering in type 2 diabetes. *N Engl J Med* 2008;**358**:2545–59.
5. ADVANCE Collaborative Group, Patel A, MacMahon S, *et al*. Intensive blood glucose control and vascular outcomes in patients with type 2 diabetes. *N Engl J Med* 2008;**358**:2560–72.
6. Duckworth W, Abraira C, Moritz T, *et al*. Glucose control and vascular complications in veterans with type 2 diabetes. *N Engl J Med* 2009;**360**:129–39.
7. Holman RR, Paul SK, Bethel MA, *et al*. 10-year follow-up of intensive glucose control in type 2 diabetes. *N Engl J Med* 2008;**359**:1577–89.
8. Inzucchi SE, Bergenstal RM, Buse JB, *et al*. Management of hyperglycaemia in type 2 diabetes: a patient-centered approach. Position statement of the American Diabetes Association (ADA) and the European Association for the Study of Diabetes (EASD). *Diabetologia* 2012;**55**:1577–96.
9. Ferrannini E, Solini A. SGLT2 inhibition in diabetes mellitus: rationale and clinical prospects. *Nat Rev Endocrinol* 2012;**8**:495–502.
10. Ferrannini E, Ramos SJ, Salsali A, *et al*. Dapagliflozin monotherapy in type 2 diabetic patients with inadequate glycemic control by diet and exercise: a randomized, double-blind, placebo-controlled, phase 3 trial. *Diabetes Care* 2010;**33**:2217–24.
11. Rosenstock J, Aggarwal N, Polidori D, *et al*. Dose-ranging effects of canagliflozin, a sodium-glucose cotransporter 2 inhibitor, as add-on to metformin in subjects with type 2 diabetes. *Diabetes Care* 2012;**35**:1232–8.

- 1  
2  
3  
4 12. Häring H-U, Merker L, Seewaldt-Becker E, *et al.* Empagliflozin As Add-on to  
5 Metformin Plus Sulfonylurea in Patients With Type 2 Diabetes: A 24-week,  
6 randomized, double-blind, placebo-controlled trial. *Diabetes Care* Published  
7 Online First: 20 August 2013.  
8  
9  
10 13. Kovacs CS, Seshiah V, Swallow R, *et al.* Empagliflozin improves glycaemic  
11 and weight control as add-on therapy to pioglitazone or pioglitazone plus  
12 metformin in patients with type 2 diabetes: a 24-week, randomized, placebo-  
13 controlled trial. *Diabetes Obes Metab* Published Online First: 1 August 2013.  
14  
15  
16 14. Wilding JPH, Woo V, Rohwedder K, *et al.* Dapagliflozin in patients with type 2  
17 diabetes receiving high doses of insulin: efficacy and safety over 2 years.  
18 *Diabetes Obes Metab* Published Online First: 1 August 2013.  
19  
20  
21 15. EMDAC FDA Backgrounder - UCM378076.pdf.  
22 <http://www.fda.gov/downloads/AdvisoryCommittees/CommitteesMeetingMaterials/Drugs/EndocrinologicandMetabolicDrugsAdvisoryCommittee/UCM378076.pdf>  
23  
24  
25  
26  
27 16. UCM334550.pdf.  
28 <http://www.fda.gov/downloads/AdvisoryCommittees/CommitteesMeetingMaterials/Drugs/EndocrinologicandMetabolicDrugsAdvisoryCommittee/UCM334550.pdf>  
29  
30  
31  
32  
33 17. Forxiga, INN-dapagliflozin - WC500136024.pdf.  
34 [http://www.ema.europa.eu/docs/en\\_GB/document\\_library/EPAR\\_-\\_Public\\_assessment\\_report/human/002322/WC500136024.pdf](http://www.ema.europa.eu/docs/en_GB/document_library/EPAR_-_Public_assessment_report/human/002322/WC500136024.pdf)  
35  
36  
37 18. Invokana\_-\_CHMP\_AR - final - WC500156457.pdf.  
38 [http://www.ema.europa.eu/docs/en\\_GB/document\\_library/EPAR\\_-\\_Public\\_assessment\\_report/human/002649/WC500156457.pdf](http://www.ema.europa.eu/docs/en_GB/document_library/EPAR_-_Public_assessment_report/human/002649/WC500156457.pdf)  
39  
40  
41  
42 19. Vasilakou D, Karagiannis T, Athanasiadou E, *et al.* Sodium-Glucose  
43 Cotransporter 2 Inhibitors for Type 2 Diabetes: A Systematic Review and  
44 Meta-analysis. *Ann Intern Med* 2013;**159**:262–74. doi:10.7326/0003-4819-  
45 159-4-201308200-00007  
46  
47  
48 20. Berhan A, Barker A. Sodium glucose co-transport 2 inhibitors in the treatment  
49 of type 2 diabetes mellitus: a meta-analysis of randomized double-blind  
50 controlled trials. *BMC Endocr Disord* 2013;**13**:58.  
51  
52  
53 21. Clar C, Gill JA, Court R, *et al.* Systematic review of SGLT2 receptor inhibitors  
54 in dual or triple therapy in type 2 diabetes. *BMJ Open* 2012;**2**.  
55  
56 22. anti-diabetes treatments when added to metformin monotherapy: a systematic  
57 review and network meta-analysis. *Diabetes Obes Metab* 2014;**16**:433–42.  
58  
59  
60

- 1
  - 2
  - 3
  - 4
  - 5
  - 6
  - 7
  - 8
  - 9
  - 10
  - 11
  - 12
  - 13
  - 14
  - 15
  - 16
  - 17
  - 18
  - 19
  - 20
  - 21
  - 22
  - 23
  - 24
  - 25
  - 26
  - 27
  - 28
  - 29
  - 30
  - 31
  - 32
  - 33
  - 34
  - 35
  - 36
  - 37
  - 38
  - 39
  - 40
  - 41
  - 42
  - 43
  - 44
  - 45
  - 46
  - 47
  - 48
  - 49
  - 50
  - 51
  - 52
  - 53
  - 54
  - 55
  - 56
  - 57
  - 58
  - 59
  - 60
23. Liakos A, Karagiannis T, Athanasiadou E, *et al*. Efficacy and safety of empagliflozin for type 2 diabetes: a systematic review and meta-analysis. *Diabetes Obes Metab* Published Online First: 26 April 2014.
24. Musso G, Gambino R, Cassader M, *et al*. A novel approach to control hyperglycemia in type 2 diabetes: sodium glucose co-transport (SGLT) inhibitors: systematic review and meta-analysis of randomized trials. *Ann Med* 2012;**44**:375–93.
25. Invokana, INN-canagliflozin - WC500156456.pdf.  
[http://www.ema.europa.eu/docs/en\\_GB/document\\_library/EPAR\\_-\\_Product\\_Information/human/002649/WC500156456.pdf](http://www.ema.europa.eu/docs/en_GB/document_library/EPAR_-_Product_Information/human/002649/WC500156456.pdf)
26. Jardiance, INN-Empagliflozin - anx\_128562\_en.pdf.  
[http://ec.europa.eu/health/documents/community-register/2014/20140522128562/anx\\_128562\\_en.pdf](http://ec.europa.eu/health/documents/community-register/2014/20140522128562/anx_128562_en.pdf)
27. Moher D, Liberati A, Tetzlaff J, *et al*. Preferred reporting items for systematic reviews and meta-analyses: the PRISMA statement. *BMJ* 2009;**339**:b2535.
28. ICTRP Search Portal. <http://apps.who.int/trialsearch/>
29. Wood L, Egger M, Gluud LL, *et al*. Empirical evidence of bias in treatment effect estimates in controlled trials with different interventions and outcomes: meta-epidemiological study. *BMJ* 2008;**336**:601–5.
30. The Nordic Cochrane Centre. *Review Manager (RevMan)*. Copenhagen: 2011.
